# Supplementary material for: Modifications of Hydroxyapatite by Gallium and Silver Ions—Physicochemical Characterization, Cytotoxicity and Antibacterial Evaluation
Source: PubMed Central journal article supplement (PMC7404191; doi:10.3390/ijms21145006), 2020-07-15
Supplement: ijms-21-05006-s001.pdf [file ijms-21-05006-s001.pdf]

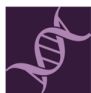

### Supplementary Materials

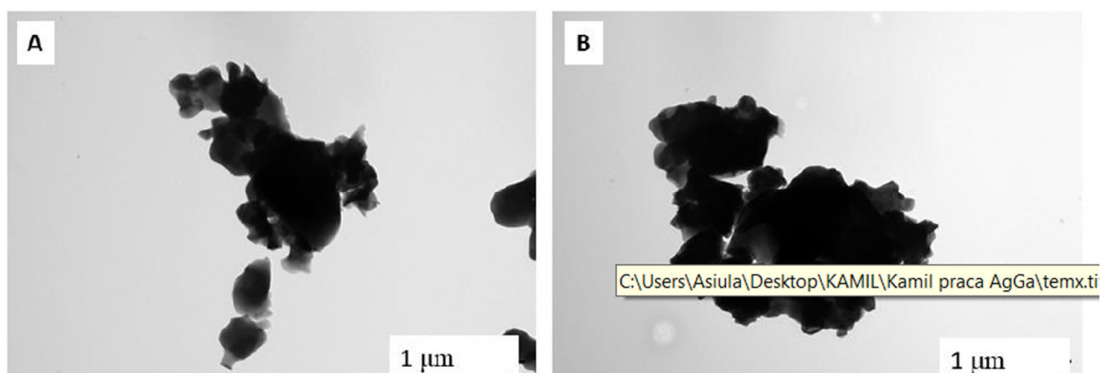

**Figure S1.** TEM micrographs of the 5Ag-HAd (A) and 5Ag5Ga-HAd (B) samples.

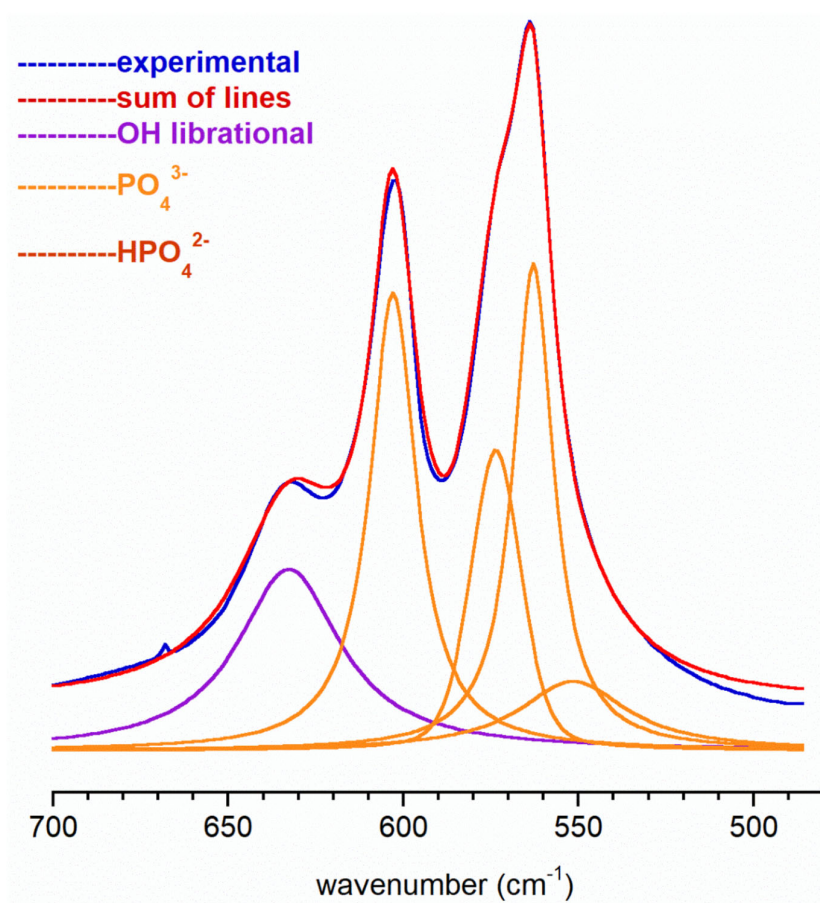

**Figure S2.** Curve fitting for the FT-IR spectrum of the 5Ag5Ga-HAd sample.

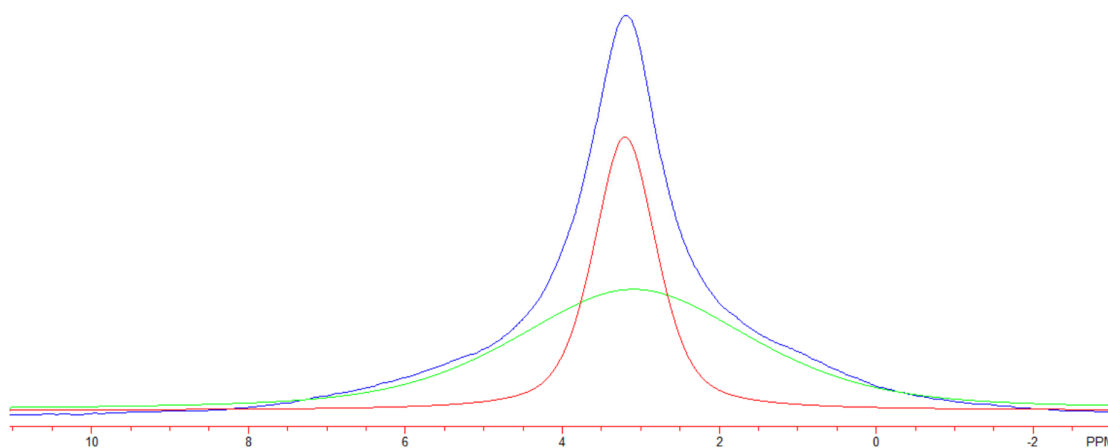

**Figure S3.** Line fitting for the  $^{31}\text{P}$  CP MAS NMR spectrum of the 5Ag-HAw sample (blue – an experimental line; red – a narrow line; green – w broad line).

**Table S1.** Share of librational bands in the region 700–480 cm<sup>-1</sup>.

| % of total area<br>OH librational bands |        |
|-----------------------------------------|--------|
| HAw                                     | 30 ± 3 |
| 1Ag-HA                                  | 26 ± 2 |
| 5Ag-HAw                                 | 27 ± 2 |
| 5Ga-HAw                                 | 23 ± 2 |
| 1Ag5Ga-Haw                              | 25 ± 1 |
| 5Ag5Ga-HAw                              | 20 ± 2 |
| HAd                                     | 34 ± 2 |
| 1Ag-HAd                                 | 30 ± 3 |
| 5Ag-HAd                                 | 28 ± 2 |
| 5Ga-HAd                                 | 21 ± 2 |
| 1Ag5Ga-Had                              | 24 ± 2 |
| 5Ag5Ga-HAd                              | 20 ± 3 |

**Table S2.** Curve fitting results for the 31P CP NMR spectra (MAS at 7.0 kHz, the CP contact time of 2 ms).

|            | Chemical shift (ppm) |       | FWHM <sub>a</sub> (Hz) |       | % of total area |       |    |
|------------|----------------------|-------|------------------------|-------|-----------------|-------|----|
|            | narrow               | broad | narrow                 | broad | narrow          | broad |    |
| HAw        | 3.09                 |       | 3.01                   | 144   | 418             | 51    | 49 |
| 1Ag-HAw    | 3.21                 |       | 3.31                   | 151   | 569             | 38    | 62 |
| 5Ag-HAw    | 3.20                 |       | 3.10                   | 153   | 579             | 38    | 62 |
| 5Ga-HAw    | 3.16                 |       | 2.95                   | 165   | 605             | 31    | 69 |
| 1Ag5Ga-Haw | 3.17                 |       | 3.25                   | 154   | 570             | 36    | 64 |
| 5Ag5Ga-HAw | 3.24                 |       | 3.30                   | 167   | 618             | 28    | 72 |
| HAd        | 2.92                 |       | -                      | 71    | -               | 100   | -  |
| 1Ag-HAd    | 2.87                 |       | -                      | 70    | -               | 100   | -  |
| 5Ag-HAd    | 2.90                 |       | -                      | 72    | -               | 100   | -  |
| 5Ga-HAd    | 2.88                 |       | -                      | 74    | -               | 100   | -  |
| 1Ag5Ga-Had | 2.88                 |       | -                      | 75    | -               | 100   | -  |
| 5Ag5Ga-HAd | 2.90                 |       | -                      | 78    | -               | 100   | -  |

<sup>a</sup> full width in half minimum (in Hz).

**Table S3.** Neutral red uptake assay results for all dilutions of extracts obtained from tested samples after incubation in the culture medium.

| Extract concentrations [mg/mL]: | 100                         | 50      | 25      | 12.5     |
|---------------------------------|-----------------------------|---------|---------|----------|
| <b>Sample:</b>                  | <b>Cells viability [%]:</b> |         |         |          |
| HA-w                            | 89 ± 8                      | 100 ± 4 | 102 ± 5 | 103 ± 5  |
| 1Ag-HAw                         | 84 ± 4                      | 100 ± 8 | 97 ± 3  | 99 ± 5   |
| 5Ag-HAw                         | 0 ± 0                       | 92 ± 1  | 94 ± 2  | 94 ± 7   |
| 5Ga-HAw                         | 82 ± 7                      | 97 ± 9  | 98 ± 5  | 102 ± 6  |
| 1Ag5Ga-HAW                      | 83 ± 5                      | 89 ± 1  | 94 ± 3  | 104 ± 17 |
| 5Ag5G-HAW                       | 96 ± 3                      | 108 ± 5 | 105 ± 0 | 107 ± 4  |
| HAd                             | 97 ± 10                     | 99 ± 4  | 101 ± 4 | 103 ± 3  |
| 1Ag-HAd                         | 82 ± 6                      | 93 ± 3  | 103 ± 3 | 100 ± 2  |
| 5Ag-HAd                         | 81 ± 6                      | 96 ± 2  | 109 ± 7 | 105 ± 3  |
| 5Ga-HAd                         | 1 ± 1                       | 3 ± 2   | 1 ± 1   | 25 ± 8   |
| 1Ag5Ga-HAd                      | 4 ± 10                      | 0 ± 1   | 32 ± 14 | 75 ± 9   |
| 5Ag5Ga-HAd                      | 0 ± 0                       | 4 ± 7   | 34 ± 8  | 82 ± 10  |

**Table S4.** Inhibition zone measurements (antimicrobial activity against *P. fluorescens*).

| Sample     | Inhibition zone (mm) |
|------------|----------------------|
| Haw        | 13                   |
| 1Ag-Haw    | 16                   |
| 5Ag-Haw    | 17                   |
| 5Ga-Haw    | 17                   |
| 1Ag5Ga-Haw | 17                   |
| 5Ag5Ga-Haw | 19                   |
| HAd        | 13                   |
| 1Ag-HAd    | 16                   |
| 5Ag-HAd    | 17                   |
| 5Ga-HAd    | 27                   |
| 1Ag5Ga-HAd | 28                   |
| 5Ag5Ga-HAd | 30                   |

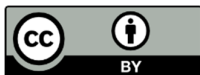

© 2020 by the authors. Licensee MDPI, Basel, Switzerland. This article is an open access article distributed under the terms and conditions of the Creative Commons Attribution (CC BY) license (<http://creativecommons.org/licenses/by/4.0/>).
